1 Co-expression signatures of combinatorial gene regulation

2

3 Fabio Gomez-Cano<sup>1</sup>, Qian Xu<sup>1,4</sup>, Shin-Han Shiu<sup>2,3</sup>, Arjun Krishnan<sup>1,3</sup>, Erich Grotewold<sup>1\*</sup>

4

5 <sup>1</sup>Department of Biochemistry and Molecular Biology, <sup>2</sup>Department of Plant Biology, and

6 <sup>3</sup>Department of Computational Mathematics, Science and Engineering, Michigan State

7 University, East Lansing, MI 48824, USA.

8 <sup>4</sup>Current address: Division of Science and Technology, Beijing Normal University-Hong Kong

9 Baptist, University United International College, Zhuhai, Guangdong

10

11 \*Corresponding author [grotewol@msu.edu](mailto:grotewol@msu.edu)

12

13

14 **Abstract**

15 Gene co-expression analyses provide a powerful tool to determine gene associations. The  
16 interaction of transcription factors (TFs) with their target genes is an essential step in gene  
17 regulation, yet to what extent TFs-target gene associations are recovered in co-expression  
18 studies remains unclear. Using the wealth of data available for Arabidopsis, we show here that  
19 protein-DNA interactions are overall poor indicators of TF-target co-expression, yet the  
20 inclusion of TF-TF interaction information significantly enhance co-expression signals. These  
21 results highlight the impact of combinatorial gene control on such gene association networks.  
22 We integrated this information to predict higher-order regulatory complexes, which are difficult  
23 to identify experimentally. We demonstrate that genes strongly co-expressed with a TF are also  
24 enriched in indirect targets. Our results have significant implications on the empirical  
25 understanding of complex gene regulatory networks and transcription factor function, and the  
26 significance of co-expression from the perspective of protein-protein and protein-DNA  
27 interactions.

28

29

30

31

32

33

34

35

36

37

38

39

40

41

42

## 43 INTRODUCTION

44 The translation of genotype into phenotype is largely dependent on genes being expressed  
45 in the appropriate cell types at the correct time. Such expression is mainly controlled by  
46 transcription factors (TFs) recognizing specific *cis*-regulatory regions in the genes that they  
47 regulate resulting in protein-DNA interaction (PDI) networks with scale-free properties  
48 characteristic of each organism<sup>1</sup>. PDIs are experimentally identified using combinations of  
49 gene- and TF-centered approaches; gene-centered approaches result in the identification of TF  
50 regulators for specific genes, while TF-centered approaches permit to identify target genes of a  
51 particular TF<sup>2-4</sup>. The yeast one-hybrid (Y1H) assay provides the most commonly used gene-  
52 centered approach<sup>3</sup>, while TF-centered strategies include chromatin-immunoprecipitation  
53 (ChIP) and DNA-affinity purification (DAP) methods, often coupled with high-throughput  
54 sequencing (ChIP-Seq and DAP-Seq, respectively)<sup>5,6</sup>.

55 Identification of PDIs is particularly important in the context of the effect that a TF has on  
56 the expression of its target genes. Often, however, identified TF targets show no changes in  
57 expression when the activity of the corresponding TF is perturbed<sup>7-11</sup>. While in some instances  
58 technical artifacts are responsible, the low overlap between TF targets and differentially  
59 expressed genes are more often due to redundancy in the activity of the TF<sup>12,13</sup>, and regulation  
60 of the target gene by the TF in only a fraction of the cells sampled. For these reasons, the  
61 tethering of a TF to the regulatory region of a gene without a clear contribution to the control  
62 of the gene's expression is often considered of limited biological significance<sup>14,15</sup>.

63 Conversely, it is generally assumed that genes with very similar expression patterns are  
64 potentially regulated by similar mechanisms, involving shared TFs<sup>16,17</sup>. Similar patterns of gene  
65 expression can be captured by gene co-expression networks, in which each node in the network  
66 represents a gene, and two nodes can be connected by an edge if they have a significant co-  
67 expression relationship<sup>18</sup>. Co-expression relationships can be measured by correlation  
68 coefficients, such as Pearson Correlation Coefficients (PCCs), or mutual information (MI)  
69 measures, each having advantages and disadvantages<sup>19</sup>. Multiple examples of implementation  
70 of co-expression networks or specific TF-target co-expression patterns have allowed the  
71 prioritization of specific PDI<sup>14,20</sup>. However, it is unclear to what extent co-expression networks  
72 are able to recapitulate PDI networks. Integrating the data of PDIs and gene co-expression  
73 networks is not trivial, and researchers usually accept that biologically associated genes and  
74 PDIs will show a robust co-expression<sup>21,22</sup>, and/or that genes highly co-expressed are subject to  
75 similar regulatory programs<sup>22</sup>. This hypothesis was tested in *Saccharomyces cerevisiae*, where

76 it was shown that two genes have a 50% probability to be controlled by the same TF if the  
77 expression correlation coefficient is of 0.84<sup>23</sup>. However, it remains unclear if, in other  
78 organisms, co-expression has a similar predictive value to identify TF targets.

79 TFs function in large complexes, increasing the specificity by which a target gene is  
80 recognized, and expanding the regulatory repertoire of a proportionally small number of TFs  
81 for a much larger number of genes that they need to regulate. This is generally known as  
82 combinatorial gene regulation<sup>24,25</sup>. Components of regulatory complexes assemble through  
83 protein-protein interactions (PPIs) and/or PDIs. Models have been developed that use  
84 collections of PDIs (or collections of *cis*-regulatory elements) to predict modules of TFs  
85 working together<sup>22,26,27</sup>. Similarly, algorithms are available that integrate information from PPIs  
86 and PDIs to predict target gene expression, or that combine co-expression with multiple data  
87 layers (including PPIs and PDIs) to predict gene regulation<sup>14,28,29</sup>. However, in all these models,  
88 the co-expression is used a prioritization tool, and in most instances, the impact of PPIs and  
89 PDIs on the expression of the genes that they control must be experimental determined<sup>30</sup>. For  
90 the most part, it remains unclear to what extent the co-expression patterns of a TF and its targets  
91 is affected by the formation of TF complexes, a general characteristic of regulation of gene  
92 expression in eukaryotes<sup>31</sup>.

93 *Arabidopsis* provides an attractive system to investigate the co-expression relationships  
94 between TFs and their experimentally identified target genes in a multi-cellular organism  
95 setting. The ATTED-II (<http://atted.jp/>) database furnishes co-expression information derived  
96 from different gene expression analyses<sup>32</sup>. In addition, over five million PDIs have been  
97 determined by ChIP-Seq (and ChIP-chip) or DAP-Seq, and most are available through AGRIS  
98 (<http://agris-knowledgebase.org/>)<sup>33,34</sup>. Finally, there are 9,503 experimentally established PPI  
99 for *Arabidopsis* TFs that can be accessed through the BioGRID database<sup>35</sup>. Here, we used the  
100 wealth of information available in *Arabidopsis* to determine how frequently a TF is co-  
101 expressed with its corresponding target genes, and how the co-expression patterns are affected  
102 by the formation of TF-TF complexes. We used co-expression analyses at different scales to  
103 determine that about half of the TFs are globally co-expressed with their targets as a set, with  
104 this number increasing to 85% when local co-expression patterns are considered. We show that  
105 a small fraction (in average ~5%) of the direct targets are robustly co-expressed with the  
106 corresponding TF. However, when TF complexes deduced from available PPI data are  
107 considered, the number of targets co-expressed with a TF significantly increases. By integrating  
108 PDIs, PPIs and co-expression information, we predicted the formation of ternary TF complexes,  
109 some with strong support from experimental data. Finally, we determined TF's most highly co-

110 expressed are larger presented by direct and indirect TF targets. Our findings have significant  
111 implications on the empirical understanding of complex gene regulatory networks, and the  
112 meaning of co-expression from the standpoint of PPIs and PDIs.

113

## 114 RESULTS

115 **Transcription factors and their direct targets show varying levels of co-expression.** To  
116 investigate the co-expression of *Arabidopsis* TFs and their direct target genes, we collected  
117 existing PDI data, involving 555 TFs and 25,255 target genes (see *Methods*, Supplementary  
118 Table 1). With these dataset, we built a PDI network that included 2,271,066 interactions that  
119 were then used to interrogate the co-expression relationships between each TF and its targets,  
120 using the mutual rank (MR) of the PCC (MR-PCC), as reported by ATTED-II<sup>32</sup>, and the mutual  
121 rank of the mutual information (MR-MI) (See *Methods*). We used PCC and MI capturing linear  
122 and non-linear relationships, respectively<sup>36</sup>, and the corresponding MR value in order to reduce  
123 dataset-dependent associations and to improve the predictive power of functional  
124 associations<sup>32,37</sup>.

125 To evaluate the significance of the co-expression value for each TF and its entire set of  
126 target genes, we carried out two different analyses for each TF: (1) We compared the average  
127 MR of a TF with its targets versus the average MR of the TF with a similarly-sized random  
128 gene set. Those TFs which showed significant differences with the random set were scored as  
129 ‘co-expressed by MR average’ (See *Methods*). (2) We evaluated differences in the distributions  
130 of the MRs of a TF with its targets versus all the non-targets genes. Those TF-targets that  
131 showed significant differences ( $P < 0.05$ , Kolmogorov-Smirnov test) from the distribution of  
132 the TF-non-target distributions were scored as ‘co-expressed by MR distribution’ (See  
133 *Methods*). It should be noted that all the analyses based on MR-PCC values were done  
134 independently for negative and positives correlation values. Also, given that we used MR-PCC  
135 values and calculated MR-MI co-expression values based on multiple expression experiments  
136 (See *Methods*), these results represent TF-target global co-expression patterns. Overall,  
137 combining both statistical tests (Supplementary Fig. 1a, b), we determined that 231/555 (using  
138 MR-PCC) and 172/555 (using MR-MI) corresponded to TFs globally co-expressed with their  
139 corresponding sets of targets, with 124 TFs in common between both MR-PCC and MR-MI  
140 (Fig. 1a). However, for 276/555 TFs, the co-expression values with their respective targets were  
141 not significantly different from what could be expected for a random set of genes, or from non-  
142 target genes.

143 A closer look into the MR-PCC results allowed us to establish that 186/231 TFs showed  
144 significant co-expression (either by MR distribution and/or MR average tests) only with  
145 positively co-expressed targets (potential transcriptional activators), and 23/231 only with  
146 negatively co-expressed targets (potential transcriptional repressors) (Supplementary Fig. 1c).  
147 Remarkably, 22 TFs showed significant co-expression with both positively and negatively  
148 associated target genes, indicating that they can function both as transcriptional activators or  
149 repressors, depending on the target gene subset (Supplementary Fig. 1c).

150 To further characterize the TFs significantly co-expressed and not co-expressed with their  
151 targets (Fig 1a), we evaluated the accumulation of targets genes along the MR distribution based  
152 on the PCC and MI metrics. Thus, we first separated the TFs into four co-expression groups:  
153 TFs co-expressed with its targets based on MR-PCC (107 TFs), on MR-PCC and MR-MI (124  
154 TFs), MR-MI (48 TFs), and TFs that did not shown significant co-expression with their  
155 corresponding targets (276 TFs) (Fig 1a). Then, we binned the MR distribution from the  
156 smallest to the largest rank to account for the percentage of total targets genes that fall into each  
157 bin. Thus, small and large MR-PCC values corresponded to the most positive and negative co-  
158 expression values, respectively. On the MR-PCC distribution, TFs significantly co-expressed  
159 with their targets were found to be distributed along the first 24 bins on either the positive or  
160 negative values (Fig 1b). This pattern was different for TF-target associations that showed non  
161 statistically significant co-expression MR values (Fig 1b, gray panel). Similar patterns were  
162 observed for the MR-MI distribution (Supplementary Fig. 2). It was notable that the number of  
163 target genes, even in those bins showing the highest absolute vales of co-expression, did not  
164 exceed 4-5% of the total targets for any TF, with an ~1% constant number of targets present  
165 over all the bins of the distribution (Fig 1b, indicated by the target % curve under every graph).  
166 These results indicate that, for *Arabidopsis*, no simple co-expression relationship exists between  
167 TFs and their experimentally determined direct targets.

168 To determine whether signatures of local co-expression could be identified for the 276 TFs  
169 that showed no significant global co-expression with their targets, we first grouped the 1,409  
170 gene expression datasets available at ATTED-II into 12 sample clusters (Supplementary Fig.  
171 3), using k-means clustering after a dimensionally reduction of the expression data (See  
172 Supplementary Note 1). These 12 cluster were defined as local expression conditions, and by  
173 extension were used to re-calculate local MR-PCC and MR-MI values. Using the two statistical  
174 tests described above, we determined that 199/276 TFs significantly co-expressed with their  
175 corresponding targets in at least one of the clusters (Fig. 1c). As expected, TFs globally co-  
176 expressed with their targets were found to be co-expressed in many local clusters (Fig. 1c), with

177 the exception of seven TFs (WIP5, MYB1, PLT1, ERF109, HHO5, NAC4, and AT5G47660),  
178 which showed significant global co-expression, but no obvious local co-expression in any of  
179 the clusters. The reason for this intriguing behavior is not yet clear.

180 We investigated what might characterize those TFs that are not co-expressed with their  
181 targets globally or locally. We noticed that the connectivity in the network between TFs that  
182 show global or local co-expression with their targets compared to those TFs that don't co-  
183 expressed is significantly different. Both the in-degree, which represents how many different  
184 TFs bind to a particular promoter region (see *Methods*), as well as the out-degree, which  
185 represents the number of target genes bound by a given TF, are significantly smaller for TFs  
186 that are not co-expressed with their targets ( $P < 0.05$ , Mann-Whitney U test; Supplementary  
187 Fig. 4). While these results may suggest that lowly-connected TFs in the network exhibit a  
188 different co-expression relationship with their targets, we cannot yet rule out that the clusters  
189 might not be 'local enough' for these TFs.

190  
191 **Few targets are highly co-expressed with their respective TFs.** The accumulation of  
192 target genes along the MR-PCC distribution previously described (Fig. 1b) indicates a low  
193 abundance of targets among the genes most highly co-expressed with each respective TF.  
194 Indeed, the maximum percentage of targets within a bin of 250 co-expressed genes is ~5% (Fig.  
195 1b), and the percentage of targets by bin decreases after the first 5,000 MRs, which captures at  
196 most 25% of the total direct targets identified for each TF.

197 To evaluate the percentage of highly co-expressed targets (HCT) for each TF, we defined  
198 the top and bottom 2.5% of the MR-PCC distribution as the set of highly co-expressed genes  
199 (HCGs), and then we counted the total number of targets in these intervals. The TF that has the  
200 maximum percentage of target genes (36%) identified as HCTs using the above criteria was  
201 found to be ARABIDOPSIS PSEUDO-RESPONSE REGULATOR 9 (PRR9). However, on  
202 average, only 4.7% of the targets corresponded to HCTs (Fig. 2a), indicating that (on average)  
203 the remaining 95.3% of the targets corresponded to low co-expressed targets (LCTs).

204  
205 **PPIs condition TF co-expression with direct targets.** To better understand why so few  
206 targets are highly co-expressed with any given TF, we investigated how having multiple, often  
207 physically interacting, TFs controlling any given gene might influence binary TF-target co-  
208 expression metrics. For this, we collected from BioGRID 815 experimentally determined PPIs  
209 involving 313/555 TFs studied here. Using this PPI information, we evaluated to what extent  
210 the formation of a TF complex (*e.g.*, TF<sub>x</sub>-TF<sub>z</sub>) explains the large fraction of LCTs for each TF<sub>x</sub>

211 by calculating the partial co-expression correlation of  $TF_x$  with all the LCTs, conditioned on  
212  $TF_z$ <sup>38-40</sup>. It should be noted that such correlations are not symmetric, meaning that  $T_xCC$  could  
213 be different from  $T_zCC$ . We assessed the correlation with all the *Arabidopsis* genes to define  
214 the top 2.5% (at each tail of the correlation distribution) of highly co-expressed genes for each  
215  $TF_x$ - $TF_z$  complex. We found that, in average, 5% of the LCTs of a TF are co-expressed with  
216 the complexes in which the TF is involved (Fig. 2b), and the range of co-expression of the LCTs  
217 with TF complexes (0% - 17.2%, Fig. 2b) does not depend on the total number of targets of the  
218 corresponding TF (Spearman Correlation,  $r_s = 0.02$ ) (Fig. 2c, color scale distribution). Notably,  
219 the percentage of targets co-expressed with a complex increased as a function of the number of  
220 interactors that a TF has (correlation,  $r_s = 0.69$ ) (Fig. 2c), indicating that a significant proportion  
221 of the LCTs described previously can be explained by considering complexes of interacting  
222 TFs.

223 Even among TFs known to form similar number of complexes, there is significant variation  
224 in the proportion of LCTs that co-express with the complex (Fig. 2d). For example, when we  
225 focused on TFs that have just one known partner, we observed that the extreme examples in  
226 this group corresponded to DEHYDRATION RESPONSE ELEMENT-BINDING PROTEIN  
227 26 (DREB26) and RELATED TO AP2 11 (RAP2.11), which interact with BASIC HELIX  
228 LOOP HELIX PROTEIN 10 (BHLH010) and ELONGATED HYPOCOTYL 5 (HY5), and for  
229 which the complex explain 11.3% and 2.7% of LCTs, respectively (Fig. 2d). This result shows  
230 that each TF complex has a specific and unique effect on the percentage of targets that are co-  
231 expressed, possibly reflecting functional aspects of combinatorial gene regulation.

232 So far, we have shown that the co-expression of TFs with their targets can be enhanced by  
233 considering the regulatory complexes in which each TF is involved. Although, all these  
234 interacting TFs share a variable number of common targets ( $TF_x$ - $TF_z$  in Fig. 2e), only a small  
235 fraction of the shared targets are co-expressed with the complex ( $T_xCC$ - $T_z$ , Fig. 2e). Thus, to  
236 better understand the co-expression behavior of the  $TF_x$  and  $TF_z$  shared targets, we compared  
237 which fraction of the targets common to both  $TF_x$  and  $TF_z$  that co-express with the  $TF_x$ - $TF_z$   
238 complex are also highly co-expressed with  $TF_z$  (Fig. 2f, blue box), are co-expressed with the  
239 complex  $TF_z$ - $TF_x$  (Fig. 2f, orange box), or are among the low co-expressed targets with  $TF_z$   
240 (Fig. 2f, grey box). Overall, 91% of the shared targets of  $TF_x$  and  $TF_z$  that are co-expressed with  
241 the  $TF_x$ - $TF_z$  complex ( $T_xCC$ ) correspond to targets of  $TF_z$  that show modest co-expression with  
242  $TF_z$  ( $LCT_z$ , grey in Fig. 2g). Only 3.9% of the  $TF_x$ - $TF_z$  shared targets is highly co-expressed  
243 with  $TF_z$  (Fig. 2g, blue box), and 4.1% with both complex ( $T_xCC$  and  $T_zCC$ ) (orange in Fig.



244 2g). These results underscore the importance of considering TF complexes when interpreting  
245 the (lack of) co-expression between TFs and their targets.

246 To evaluate the biological relevance of the observed co-expression of targets with TF  
247 complexes, but not with the individual TFs, we focused our attention on a few examples. HHO2  
248 (HRS1 HOMOLOG2) and HHO3 (HRS1 HOMOLOG3) encode MYB-related TFs involved in  
249 phosphate homeostasis and lateral root development<sup>41</sup>, which also participate in nitrogen  
250 responses<sup>42</sup>. Our analysis showed that the HHO2-HHO3 complex co-expressed with 43 targets.  
251 Note, HHO2 and HHO3 as well as six of its targets are differentially expressed genes that  
252 respond to different N growth conditions (Fig. 2h), supporting the idea of functional relevance  
253 of complex formation and its targets. We also analyzed the SHORT VEGETATIVE PHASE  
254 (SVP) - G-BOX BINDING FACTOR 2 (GBF2) complex. SVP is a flowering repressor<sup>43</sup> related  
255 also to drought responses<sup>44</sup>. GBF2 has been related to abscisic acid (ABA) responses<sup>45</sup>. Our  
256 results indicated that the SVP-GBF2 allow us to identify 429 shared co-expressed targets (Fig.  
257 2i), of which 130 genes were also differentially expressed under drought responses<sup>44,46,47</sup>.  
258 Altogether, these results provide further evidence that an important fraction of TF targets that  
259 do not significantly co-express with the TF are indeed co-expressed when TF complexes are  
260 considered.

261 **Co-expressed targets shared by binary TF complexes suggest higher-order**  
262 **arrangements.** Our results indicate that the integration of co-expression and physical  
263 interaction information contributes to the identification of TFs that control gene expression  
264 working as part of complexes. There are many instances in which *Arabidopsis* TF pairs interact  
265 and control shared sets of target genes<sup>25,48</sup>. However, the experimental identification of higher-  
266 order TF complexes is not without challenges<sup>49</sup>.

267 To investigate whether the combination of co-expression, PPI, and PDI information might  
268 provide insights on higher-order TF complexes, we started by describing the complexes made  
269 up by TGA10 (TGACG MOTIF-BINDING PROTEIN 10), TCP14 (TGA10 with TEOSINTE  
270 BRANCHED, cycloidea and PCF 14), and a homeodomain-like TF (AT2G40260)<sup>50</sup>. The  
271 TGA10-TCP14 and TGA10-AT2G40260 complexes share 80% of targets co-expressed with  
272 each complex (Fig. 3a, black nodes). Moreover, shared targets had similar expression  
273 correlation with both heterodimers (either positive or negative), indicating that both complexes  
274 potentially activate or repress the same sets of genes (Fig. 3a). These results, combined with  
275 the information that TCP14 and AT2G40260 physically interact with each other<sup>50</sup>, provide  
276 strong evidence that TGA10, TCP14, and AT2G40260 form a ternary complex that controls the  
277 expression of all targets indicated in Fig. 3a.

278 We next investigated how many other instances of such ternary pairs (tri-bi, from here on,  
279 for triple-binary) of TFs might be present in *Arabidopsis*. For this, we first identified 47 TFs  
280 with at least two interactors and with PDI information to determine the percentage of shared  
281 target genes between both pairs (Fig. 3b, orange), and compared the total percentage of shared  
282 target with the percentage targets of just one pair (Fig. 3b, gray). In some instances, all targets  
283 are shared by the two binary complexes (all orange columns, Fig. 3c), while only ~8% are  
284 shared by those binary complexes with the smallest overlap (columns to the right, Fig. 3c).  
285 Providing supporting evidence for the formation of higher-order (ternary) complexes, for 13/47  
286 tri-bi tested there is PPI information for all three binary interactions (indicated by black arrows  
287 in Fig. 3c). However, we could not establish a statistically significant correlation linking the  
288 number of shared targets and experimental evidence confirming the formation of ternary  
289 complexes. While it is possible that the percentage of shared co-expressed targets is not a good  
290 indicator of the formation of ternary complexes, the lack of a statistically significant correlation  
291 more likely reflects sparse PPI data for many of the TF pairs involved.

292 We next investigated how frequently TFs involved in tri-bi interactions share common  
293 targets. In total, we found 2,013 true tri-bi instances (*i.e.*, with evidence of physical interaction  
294 for all pairs of the tri-bi) involving 140 TFs. In ~90% of these cases, the TFs involved showed  
295 a significant overlap of target genes (false discovery rate < 0.01, Fisher's exact test)  
296 (Supplemental Table 2), indicating that TFs involved in tri-bi interactions which share a  
297 significant fraction of targets are excellent candidates for the formation of tertiary, or even  
298 higher-order, complexes. To determine if the fraction of shared targets differ from random tri-  
299 bi complexes, we compared the shared targets co-expressed of TF complexes from tri-bi  
300 instances experimentally demonstrated PPI versus tri-bi instances obtained from randomized  
301 binary interactome for each TF (see *Methods*).

302 Out of the 104 TFs, we found 12 TFs involved in tri-bi instances with a fraction of shared  
303 targets that was significantly larger (see *Methods*) than expected from the background model  
304 (Supplementary Fig. 5a). An example is provided by ABI5 (ABA INSENSITIVE5, At2g36270),  
305 which is involved in eight tri-bi instances with a median shared fraction of targets of 0.77 (Fig.  
306 3d). Notably, six out of the eight tri-bi instances involving ABI5 were composed by a  
307 combination of four TFs of the same family (ABF, ABSCISIC ACID RESPONSIVE  
308 ELEMENTS-BINDING PROTEIN) (Fig. 3e). The number of target genes for each tri-bi  
309 instance ranges from 258 for ABF2-ABI5-ABF4 to 290 for ABF3-ABI5-ABF4 (Fig. 3e). The  
310 290 ABF3-ABI5-ABF4 gene targets include 46 genes differentially expressed in *abi5* mutant  
311 seeds<sup>51</sup>. Remarkably, ABF2, ABI5, and ABF4 also interact with SnRK2.2 (SNF1-RELATED

312 PROTEIN KINASE 2), PP2CA (PROTEIN PHOSPHATASE 2CA)<sup>52,53</sup>, and AHG1 (ABA-  
313 HYPERSENSITIVE GERMINATION 1)<sup>52</sup>, which are key known posttranslational regulators  
314 of ABI5<sup>54</sup>. We also found 41 TFs involved in tri-bi instances with a fraction of shared targets  
315 that were significantly lower than expected from the background model (Supplementary Fig.  
316 5b). Assuming that the binary PPIs that form these bi-tri instances occur *in vivo*, these results  
317 strongly suggest that they involve TFs that bind overlapping sets of target genes as part of  
318 dimeric complexes.

319

320 **Genes highly co-expressed with TFs are enriched in indirect TF targets.** In previous  
321 sections, we focused on the patterns of co-expression between TFs and their direct targets.  
322 However, a question that remains unanswered is whether there is a relationship between a TF  
323 and the genes that are most highly co-expressed with that TF. To address this, we determined  
324 how many target genes of a TF are also among the top 5% most highly co-expressed gene  
325 (HCG) with the TF in question. Strikingly, for 80% of the TFs, less than 30% of the HCG are  
326 among the target genes, although exceptionally [for NF-BY2 (nuclear factor Y, subunit B2)]<sup>45</sup>  
327 this number can be as high as 82% (14.3% in overall average) (Fig. 4a). We explored the  
328 possibility that genes that are not direct targets of a TF<sub>x</sub> could be targets of a TF<sub>x</sub> partner (TF<sub>z</sub>),  
329 or that they could be targets of a second TF (TF<sub>y</sub>) that is itself direct target of TF<sub>x</sub>.

330 To determine the contribution of the TF partners (TF<sub>z</sub>) to the set of genes highly co-  
331 expressed with TF<sub>x</sub>, we evaluated how many of highly co-expressed genes of TF<sub>x</sub> are targets of  
332 any TF<sub>z</sub>, but not of TF<sub>x</sub> itself. In total, we found that 309 TFs (out of the 313 TFs tested) had at  
333 least one highly co-expressed gene that was target of the any of its TF<sub>z</sub> partners. On average,  
334 we determined that 10% of the highly co-expressed genes of a TF correspond to this class (Fig.  
335 4b) (Supplementary Table 4).

336 To establish the contribution of indirect targets to the set of genes most highly co-expressed  
337 with a TF in regulatory hierarchy (TF<sub>y</sub>), we analyzed the same set of 313 TFs. From these TFs,  
338 306 bind a TF<sub>y</sub> which had at least one direct target also highly co-expressed with the upstream  
339 TF<sub>x</sub>. On average, 9.8% of the genes most highly co-expressed with a TF<sub>x</sub> corresponded to  
340 indirect targets of TF<sub>y</sub> (Fig. 4c). We compared the actual set of HCGs recovered based on true  
341 interaction versus random networks (of PPI and PDI, respectively) (See *Methods*). Overall,  
342 random TF PPIs recover a similar number of HCG than known PPIs ( $P < 0.05$ , Mann-Whitney  
343 U test) (Supplementary Fig. 6a). Note, the PPI network used here does have an average path  
344 length of 3.5 edges between all its nodes (TFs), which is an indication of a weak independence  
345 between the true and the random PPIs. In contrast, random target TF<sub>y</sub> recovered a significantly

346 smaller number than the ones recovered by true targets ( $P < 0.05$ , Mann-Whitney U test)  
347 (Supplementary Fig. 6b), suggesting that indirect hierarchical regulation plays a major role in  
348 the explanation of HCG as indirect targets.

349 We calculated the total contribution of direct and indirect targets to the set of highly co-  
350 expressed genes for each of 313 TFs by adding up the contribution of all its interactors ( $TF_z$ )  
351 and downstream TFs ( $TF_y$ ) (Fig. 4d). Taken together, our results indicate that on average ~90%  
352 of the genes most highly co-expressed with a TF are direct targets of the TF (~16%), direct  
353 targets of a partner of the TF (~4%, after removing partners which are also direct targets of the  
354  $TF_x$ ), and indirect targets (~70%, targets of a TF target) (Fig. 4d). Interestingly, in a 26% from  
355 the total, the partner for  $TF_x$  is also a downstream target, participating in a of feed-forward loop  
356 (FFL). FFLs are among the most highly represented regulatory motifs present in *Arabidopsis*<sup>43</sup>  
357 and other eukaryotes<sup>55</sup>.

358

## 359 DISCUSSION

360 Our study investigated complex co-expression relationships between TFs and their targets,  
361 taking advantage of the extensive PDI, PPI and gene expression data available for *Arabidopsis*.  
362 We show that approximately 50% (279) of the 555 TFs investigated are globally co-expressed  
363 with their targets as a set, while an additional 35% (199) are co-expressed with their targets in  
364 at least one of the 12 clusters into which we grouped the ~1,400 RNA-Seq experiments  
365 available. This means that for 77 *Arabidopsis* TFs for which there is extensive PDI information,  
366 there is no evidence that they are co-expressed with the identified targets any better than with  
367 random sets of genes. Given that many TFs did not show global co-expression with their targets,  
368 but only when specific subsets of the expression data was used, the possibility exists that using  
369 single cell sequencing may reveal co-expression relationships that are masked by the  
370 complexity of the cell populations used in organ-level gene expression experiments.

371 We show that only a small fraction ( $< 36\%$ , in average 4.7%; Fig. 2a) of the direct targets  
372 are among the genes most highly co-expressed with a given TF. Conversely, direct targets are  
373 a small fraction of the genes highly co-expressed with a TF ( $< 82\%$ , in average 14.3%; Fig. 5a).  
374 Given that high co-expression is often used as an additional criterium to assert the biological  
375 significance of a PDI, our results indicate that these comparisons should be used with  
376 significantly more caution.

377 In an effort to determine the co-expression relationships between TFs and their targets, we  
378 noticed that up to 17% of the not so highly co-expressed targets of one TF are in fact co-

379 expressed targets of TF complexes. Indeed, a large portion (up to 100%, in average ~22%) of  
380 the targets co-expressed with a TF complex were common targets of members of the complex,  
381 which are not highly co-expressed with individual TFs. These findings are consistent with the  
382 ample literature describing gene combinatorial control<sup>25,30,56,57</sup>. We explored the biological  
383 relevance of the targets co-expressed with two different TF complexes, HHO2-HHO3 and SVP-  
384 GBF2, by investigating their expression changes under stress conditions. Remarkable, in both  
385 cases we identified target genes and TF members of the complex that were differentially  
386 expressed. While intuitively logical, our results provide firm evidence that, to fully exploit co-  
387 expression analyses, the combinatorial nature of gene regulation needs to be considered.

388 Experimentally identifying ternary TF complexes is far from trivial. Using co-expression  
389 information combined with PPIs and shared targets derived from PDI data, we carried out an  
390 analysis of possible TF pairs that could be part of ternary TF complexes (Fig. 4c). As an  
391 example, we identified eight potential ABI5 ternary complexes that involve four out of seven  
392 TFs from the same family (ABF1/2/3/4). These results are consistent with experimental data  
393 suggesting redundant functions of ABF3 and ABI5<sup>58</sup>, and the regulatory role of ABI5 and  
394 ABF2/3/4 on the degradation of chlorophyll related genes<sup>59</sup>. In addition, it is known that  
395 ABF3/4 and NF-YC (nuclear factor Y subunit C) form a complex that is able to control  
396 flowering in response to drought by regulating expression of SOC1 (SUPPRESSOR OF  
397 OVEREXPRESSION OF CONSTANS1)<sup>60</sup>, which is also a target of ABI5 in seedlings<sup>6</sup>. These  
398 results strongly suggest the formation of a larger-order complex involving ABF3-ABF4-ABI5.  
399 Together, by integrating PPIs between TFs with co-expression studies, we were able to predict  
400 a number of potential ternary TF complexes, which could now be experimentally validated, an  
401 easier undertaking than carrying out *do novo* identification.

402 Another question addressed by this study regards the nature of the association of the other  
403 genes that are highly co-expressed with a TF, if they are not targets of the TF itself. We showed  
404 that, in average for the 313 TFs investigated, almost a third of the highly co-expressed genes,  
405 are either indirect targets of the TF (targets of a TF target), direct targets of the TF or direct  
406 targets of a TF partner. Is important to note that in many instances this number was much larger,  
407 which to some extent justifies the wide-spread use of co-expression as a proxy to carry out  
408 functional association of TFs and different plant traits<sup>29,61</sup>. However, what our studies also show  
409 is that the use of co-expression is a poor indicator of direct interactions between TFs and their  
410 target genes. Establishing the co-expression relationships of TFs and their target genes has wide  
411 implication for elucidating the architecture of gene regulatory networks in all organisms, and  
412 establishing the meaning of co-expression as a tool to elucidate molecular interactions.

413

## 414 METHODS

415 **Data collection.** Expression and global co-expression data were collected from the  
416 ATTED-II database (<http://atted.jp/>, versions Ath-r.v15-08 and Ath-r.c2-0, respectively)<sup>32</sup>. In  
417 total, we used 1,416 different RNA-Seq libraries with expression data associated for 25,296  
418 different genes. We collected the protein-DNA interaction information as raw peaks (bed or  
419 narrowpeak files from ChIP-chip, ChIP-Seq, and DAP-Seq experiments) from the Gene  
420 Expression Omnibus (GEO) and/or supplementary material from reference source  
421 (Supplementary Table 1). The assignment of a peak region to a gene was carried out assuming  
422 a promoter region of 2 kb upstream from the transcription start site (TSS) for each *Arabidopsis*  
423 gene (genome annotation TAIR10). We used all peak region sizes as reported originally. All  
424 protein-protein interactions (PPIs) used for the identification of complex co-expressed targets  
425 were collected from the BioGRID database for *Arabidopsis* (V3.5.169)<sup>35</sup>.

426

427 **Evaluation of co-expression and determination of mutual rank values.** For the  
428 evaluation of the global co-expression between TFs and their corresponding targets, we used  
429 the mutual ranks (MRs) of the Pearson Correlation Coefficient (PCC) and the Mutual  
430 information (MI) as co-expression metrics. Both metrics were represented as the MR of the  
431 correlation value between compared genes as follows:

$$432 \quad MR = \sqrt{R_{ij} \times R_{ji}}$$

433 where  $R_{ij}$  is the rank of the correlation of gene  $i$  with the gene  $j$ , and  $R_{ji}$  is the rank of the  
434 correlation of gene  $j$  with the gene  $i$ , with the highest value as the best rank (close to 1). Global  
435 MRs from positive PCC were used as reported by ATTED-II, while global MRs from negative  
436 PCC values were transformed into a second MR by subtracting the original MR reported from  
437 the maximum possible MR (25,296) for each TF. For the calculation of local MRs-PCC, we  
438 used the expression normalized as reported by ATTED-II, parsing the samples into twelve  
439 expression conditions through a dimensional reduction of the total dataset, followed by a k-  
440 means analysis (see Supplementary Note 1). Grouping these samples as expression conditions,  
441 we proceeded to calculate the PCC between genes. This correlation was weighting the samples  
442 similarities based on the correlation between samples to avoid an overestimation of the  
443 correlation between genes guided by replicates. We calculated the weighted PCC using the R

444 package wCorr (Version 1.9.1)<sup>62</sup>, with an optimal threshold of 0.4, as used by ATTED-II on  
445 the global MR-PCCs. All global and local co-expression analyses using MR-MI values were  
446 carried out with the same samples used for the calculation of the respective MR-PCC values.  
447 The correlation-based on MI was estimated using the R package Parmigene (Version 1.0.2)<sup>63</sup>,  
448 and with  $1e-12$  as noise to break ties due to limited numerical precision.

449

450 **Identification of TFs co-expressed with the corresponding target genes.** The  
451 significance of the MRs between TFs and their corresponding targets was assayed using both  
452 MR-PCC and MR-MI correlation metrics, and two independent statistics tests: (1) We  
453 compared for each TF the average MR value of the targets vs. a null distribution of average  
454 MRs values from 1,000 random sets of genes, referred as co-expression by MR average. Each  
455 random sample was generated by sampling with replacement  $N$  random genes to the  $N$  number  
456 of direct targets of each TF. For the MR-PCC values, we compared separately MR distributions  
457 of positively and negatively PCC values. To define if average MRs of the target genes were  
458 significantly smaller than the null distribution, we calculated the Z-score using the MR values  
459 of the true targets using the random set of genes as background (which follow a gaussian  
460 distribution) to then ask if the P value of the Z score was significant ( $FDR < 0.05$  after correcting  
461 for multiple testing by Benjamini-Hochberg method)<sup>64</sup>. (2) We evaluated the differences  
462 between target and non-target genes by testing if their empirical cumulative distribution was  
463 similar ( $FDR < 0.05$ , one-sided Kolmogorov-mirnov test, alternative: greater), referred to as  
464 co-expressed based on MRs distribution. In both casos (co-expression base on average and  
465 distribution, we did test positive and negative correlation independently).

466

467 **Identification of targets co-expressed with TF complexes.** The identification of complex-  
468 co-expressed targets was carried out for TFs present in our list of TFs with PDI data and at least  
469 one protein-protein interaction (PPI) between them in BioGRID. In total, we found 815 protein-  
470 protein interactions (PPIs) associated with 313 different TFs. Using these PPIs, we evaluated  
471 the effect of the formation of a TF complex ( $TF_x$ - $TF_z$ ) over lowly co-expressed targets (LCTs)  
472 of  $TF_x$  by: (1) Assuming  $TF_x$ - $TF_z$  as a new protein, thus, we averaged their expression ( $TF_x$  and  
473  $TF_z$ ) and then re-calculated the co-expression of the complex with a target  $y$ . This co-expression  
474 analysis was carried out using the weighted PCC as described above. (2) We also calculated the  
475 partial correlation of  $TF_x$  with genes  $y$  conditioned by  $TF_z$ :  $p(TF_x \sim y \mid TF_z)$ , such that  $TF_x$  and  
476  $TF_z$  interact between them and  $y$  is a  $TF_x$  target. The partial correlation was calculated using  
477 the R package PPCOR<sup>40</sup>. In both cases, we calculated the co-expression of the complex against

478 all genes in the genome to define the significant values on the distribution obtained (See  
479 below).

480

481 **Definition of highly co-expressed targets.** We defined highly co-expressed genes as those  
482 genes in the top 5% of the correlation distribution, assuming them as genes with correlation  
483 values significantly different from the average of correlation distribution ( $P < 0.05$ ). For PCC  
484 values, we took the 2.5% from each tail, while for MI values we took the top 5%. The approach  
485 was also implemented to define highly target co-expressed with a complex (TCC).

486

487 **Degree network connectivity.** We defined the in-degree and the out-degree as the number  
488 of TFs that bound the promoter of a particular target genes and the number of targets of a  
489 particular TF, respectively. Differences in both degrees, in- & out-degree, between TF co-  
490 expressed with its corresponding targets and those than not were tested by a Mann-Whitney  
491 test.

492 **Protein-Protein Interactions (PPIs) and Protein-DNA interactions (PDIs) network  
493 randomization.** We created random PPIs and PDI networks to test the significance of the  
494 shared targets between dimers of the tri-bi and to test the significance of number the indirect  
495 targets within the set if genes highly co-expressed with a TFs, as well as significance of number  
496 the indirect targets by TFs in cascade. In all the cases we used the *rewire* function from the R  
497 package Igraph (v1.2.4.1) to generate the random network with similar degree by node and  
498 avoiding loops ( $niter=NodesInNetwork*1000$ ). Random PPI network was built with *directed*  
499 set as *FALSE* while the random PDI was set as *TRUE*, which allow the shuffling of edges  
500 between TF and target genes only.

501

502 **Definition of tri-bi complexes with significant number of shared targets.** In total, we  
503 selected 104 TFs after discarding tri-bi instances with no significant target overlap, as well as  
504 TFs involved in less than two tri-bi instances (to avoid comparison with few samples). To  
505 compute the differences between the random and true PPIs, we calculated the Jaccard index (J)  
506 between every pair of dimers involved in each tri-bi, and then we asked if the mean of the J  
507 values between true tri-bi instances was different from the J values mean of tri-bi instances  
508 derived from the random PPI collection (see randomization network description).

509

510 **Definition of significant number of indirect of  $TF_z$  and  $TF_y$  within HCG of a  $TF_x$ .** To  
511 test the significance of the percentages of HCG of  $TF_x$  explained because either they are targets



512 of an interactor  $TF_z$  or a target  $TF_y$ ; we compared the actual set of HCGs recovered based on  
513 true interaction versus random networks (of PPI and PDI, respectively). We measured the  
514 overlap (Jaccard index) of the HCGs of  $TF_x$  with the corresponding set of  $TF_z$  and  $TF_y$  targets.

515

## 516 **ACKNOWLEDGEMENTS**

517 This work was supported in part by grants to E.G. from the NSF IOS-1733633, the DOE  
518 DE-FOA-0001650, to S.-H.S. from NSF IOS-1546617, DEB-1655386, and DOE Great Lakes  
519 Bioenergy Research Center (BER DE-SC0018409), and to F.G.C. from MSU and NSF  
520 Research Traineeship Program (DGE-1828149).

521

## 522 **AUTHOR CONTRIBUTIONS**

523 F.G.-C. carried out the majority of the analyses with the assistance in the statistical analyses  
524 by Q.X. and A.K.; F.G.-C. and E.G. wrote the manuscript with contributions from all the  
525 authors and S.-H.S. contributed with critical discussions; E.G. coordinated and supervised the  
526 research project and agrees to serve as the author responsible for contact and communication.

527

528

## 529 **COMPETING INTERESTS**

530 The authors declare no competing interests.

531

532

## 533 **MATERIALS & CORRESPONDENCE**

534 E.G. ([grotewol@msu.edu](mailto:grotewol@msu.edu)) is the author for correspondence and material requests.

535

536

537

538

## 539 **FIGURE LEGENDS**

540 **Figure 1.** Patterns of co-expression between TFs and their direct target genes. (a) Total number  
541 of TFs co-expressed with their corresponding targets across all tissues and conditions (global)  
542 based on MR-PCC and MR-MI. The Venn diagrams represent the overlap between both type  
543 of metrics. (b) Heat maps displaying the distribution of MR-PCC values across 25,296  
544 *Arabidopsis* genes. TFs were separated into four co-expression groups: TFs co-expressed with  
545 its targets based on MR-PCC (107 TFs), on MR-PCC and MR-MI (124 TFs), MR-MI (48 TFs),  
546 and TFs that did not shown significant co-expression with its corresponding targets (555 - 107  
547 - 276 - 44 = 276 TFs). Colors represent the percentage of TF targets within bins of 250 MRs.  
548 In total, there are 101 bins along the PCC distribution corresponding to co-expression values of  
549 each TF with 25,296 genes (genes expressed in dataset used, see *Methods*). Small MR values  
550 represent positive PCC values, while large MR values correspond to negative PCC values. Dot  
551 plots (seen as curves) under each heat map represent the average percentage of targets for all  
552 the TFs for each bin. (c) Heatmap indicating the local co-expression profile of each TFs  
553 analyzed along 12 different expression clusters. The color represents binary state of co-  
554 expression with yes (co-expressed) in orange and no (no co-expression) in grey. The left panel  
555 represents TFs which are co-expressed globally with their targets, while the right panel  
556 represents those that are not.

557  
558 **Figure 2.** Targets are more frequently co-expressed with TF complexes, but not with individual  
559 TFs. (a) Violin plot showing the percentage of highly co-expressed targets (HCT) for 313 TFs.  
560 (b) Boxplot representing the percentage of low co-expressed targets (LCTs) that correspond to  
561 targets co-expressed with a TF<sub>x</sub> complex (T<sub>x</sub>CC). (c) Percentage of T<sub>x</sub>CCs as a function of the  
562 total number of PPIs in which each TF is involved. (d) Magnification of the section in (c)  
563 corresponding to TFs with just one interacting partner. DREB26-bHLH10 and ERF  
564 (At4g18450)-GT-1 represent the extreme upper and lower cases on the distribution. The color  
565 scale in (c) and (d) represent the number of targets for each TF. (e) Boxplot showing the number  
566 of shared targets between the 815 TF complexes analyzed and the number of targets of a given  
567 TF<sub>x</sub> co-expressed with the complex TF<sub>x</sub>-TF<sub>z</sub> (T<sub>x</sub>CC) that are also targets of TF<sub>z</sub>. (f) Venn  
568 diagrams displaying how targets of a TF<sub>z</sub> are distributed among the HCTs, TCCs, or LCTs of a  
569 TF<sub>x</sub> represented in blue, orange and yellow, respectively. (g) Distribution of targets according  
570 to the comparison in (f) for the of 815 TF<sub>x</sub>-TF<sub>y</sub> complexes analyzed. Complexes are along the  
571 x-axis, while the y-axis indicates the overlapping frequency. The HHO2-HHO3 (h) and SVP-  
572 GBF2 (i) TF complexes provide representative examples from the 815 TF complexes analyzed.

573 **(h)** The numbers indicate the differential expressed genes (DEG) under different nitrogen  
574 growth conditions. **(i)** The numbers indicate DEGs, also predicted as targets of the  
575 corresponding complexes, under drought stress in three different studies. Side bar plot  
576 represents a zoom over the HHO2-HHO3 and SVP-GBF2 position on the shared target  
577 distribution displayed in **(g)**.

578

579 **Figure 3.** Common co-expressed targets of TF complexes suggest higher-order TF  
580 arrangements. **(a)** Shared co-expressed targets for the TGA10-TCP14 and TGA10-AT2G40260  
581 TF complexes. Common targets for both complexes in each instance are indicated in black,  
582 while those controlled by one complex, but not by the other are in light gray. Green arrows  
583 show targets with a positive co-expression correlation (indicative of activation), while those in  
584 blue correspond to targets with a negative co-expression correlation (indicative of repression)  
585 with the respective TF complexes. **(b)** Schematic representation of the strategy used to identify  
586 shared targets by comparing  $T_xCC$  between pairs of dimers. **(c)** Percentage of the total targets  
587 that are bound by both complexes (orange) or just by one (gray). Black arrows indicate tri-bi  
588 complexes with PPI information for all three binary interactions. **(d)** ABI5 as one example of  
589 12 TFs for which the fraction of shared targets of the tri-bi complexes are significantly larger  
590 (two-sided  $t$ -test  $P < 0.05$ ) than tri-bi complexes formed by random interactions. Similarity  
591 between the sets of target genes of corresponding dimers were measured by computing the  
592 respective Jaccard indices. **(e)** Tri-bi complexes involving ABI5. Experimentally-verified  
593 interactions are indicated by lines, and targets of the complexes are indicated by the numbers  
594 in blue.

595

596 **Figure 4.** Genes highly co-expressed with TFs are enriched in indirect TF targets. **(a)**  
597 Percentage of highly co-expressed genes (HCGs) of  $TF_x$  that are actual targets of  $TF_x$ . **(b)** Model  
598 and percentage of highly co-expressed genes that are potential indirect targets of  $TF_x$  because  
599 of indirect action of a  $TF_z$  interactor of  $TF_x$ . **(c)** Model and percentage of highly co-expressed  
600 genes that are targets of a  $TF_y$  regulated by  $TF_x$ . **(d)** Percentage of HCGs explained as direct or  
601 indirect targets of  $TF_x$ .

602

### 603 **SUPPLEMENTARY FIGURE LEGENDS**

604 **Supplementary Fig. 1.** Evaluation of co-expression of TFs and corresponding target genes as  
605 a set. Comparison of the two statistical approaches used to test differences in either average or  
606 distribution of MRs between targets and not targets genes by **(a)** PCC-MR or **(b)** MI-MR. **(c)**

607 Venn diagrams comparing the total number of positive and negatively co-expressed TFs with  
608 their targets based on PCC-MR.

609

610 **Supplementary Fig. 2.** Heat maps displaying the distribution of MR-MI values across 25,296  
611 *Arabidopsis* genes. Colors represent the percentage of TF targets within bins of 250 MRs. In  
612 total, there are 101 bins along the PCC distribution corresponding to co-expression values of  
613 each TF with 25,296 genes (genes expressed in dataset used, see *Methods*). Small MR represent  
614 largest MI, thus, better association between TF and genes in bin. Dot plot under each heat map  
615 represent the average percentage of targets for all the TFs along each bin. Color side bar  
616 represent TFs categories as presented in Fig 1.

617

618 **Supplementary Fig. 3.** Sample expression clusters used to define local expression values.  
619 Clusters were defined by k-means clustering (k=12 define by Elbow method) using the t-  
620 Distributed Stochastic Neighbor Embedding (t-SNE) 1 and 2 of the expression data (See  
621 Supplemental Note 1).

622

623 **Supplementary Fig. 4.** In- and out-degree differences between TFs co-expressed and not-co-  
624 expressed with their targets. This classification accounts for both globally and locally co-  
625 expression results. Both type of degree (in and out) showed statistically significant differences  
626 between TFs co-expressed or not co-expressed with its targets (Mann-Whitney U test, P. value  
627 < 0.05).

628

629 **Supplementary Fig. 5.** Comparison of target genes recovered for tri-bi of 53 TFs with a shared  
630 fraction significantly larger **(a)** or smaller **(b)** than by random PPIs. The similarity of the  
631 recovery set of targets was measured as the Jaccard index between the set of targets of each pair  
632 of dimers that form a tri-bi complex. Asterisks indicate P-value significance (\*:  $p \leq 0.05$ , \*\*:  $p \leq 0.01$ , \*\*\*:  $p \leq 0.001$ , \*\*\*\*:  $p \leq 0.0001$ , two-sided *t*-test).

634

635 **Supplementary Fig. 6.** Comparison of HCG which are not targets of TF<sub>x</sub> recovered because  
636 they are either **(a)** a target of a TF<sub>z</sub> interactor of TF<sub>x</sub>, or **(b)** a target of a TF<sub>y</sub> regulated by TF<sub>x</sub>  
637 vs random interaction. Jaccard index (J) calculated as the number of TF<sub>z</sub>/TF<sub>y</sub> targets shared  
638 with the HCGs non-targets of TF<sub>x</sub> over the total TF<sub>z</sub>/y targets plus total HCGs no-targets.

639

640

641 **LEGENDS OF SUPPLEMENTARY TABLES**

642

643 **Supplementary Table 1.** List of TFs analyzed in this study.

644 **Supplementary Table 2.** Co-expression summary of targets of transcription factors TF<sub>z1</sub> and  
645 TF<sub>z2</sub>, which interact with TF<sub>x</sub>.

646 **Supplementary Table 3.** Co-expression summary of targets of transcription factors TF<sub>z1</sub> and  
647 TF<sub>z2</sub>, which interact with TF<sub>x</sub> and with each other

648 **Supplementary Table 4.** Total number of genes highly co-expressed (HCG) with TF<sub>x</sub> that are  
649 also targets of TF<sub>z</sub>.

650

651

652 **REFERENCES**

653

654 1. Ouma, W. Z., Pogacar, K. & Grotewold, E. Topological and statistical analyses of gene  
655 regulatory networks reveal unifying yet quantitatively different emergent properties.  
656 *PLoS Comput Biol* **14**, e1006098 (2018).

657 2. Yang, F. *et al.* A Maize Gene Regulatory Network for Phenolic Metabolism. *Mol.*  
658 *Plant* **10**, 498–515 (2017).

659 3. Arda, H. E. & Walhout, A. J. M. Gene-centered regulatory networks. *Brief. Funct.*  
660 *Genomics* **9**, 4–12 (2010).

661 4. Mejia-Guerra, M. K., Pomeranz, M., Morohashi, K. & Grotewold, E. From plant gene  
662 regulatory grids to network dynamics. *Biochim Biophys Acta* **1819**, 454–465 (2012).

663 5. Park, P. J. ChIP–seq: advantages and challenges of a maturing technology. *Nat. Rev.*  
664 *Genet.* **10**, 669–680 (2009).

665 6. O’Malley, R. C. *et al.* Cistrome and Epicistrome Features Shape the Regulatory DNA  
666 Landscape. *Cell* **165**, 1280–1292 (2016).

667 7. Zeller, K. I. *et al.* Global mapping of c-Myc binding sites and target gene networks in  
668 human B cells. *Proc. Natl. Acad. Sci.* **103**, 17834 (2006).

669 8. Liu, S., Kracher, B., Ziegler, J., Birkenbihl, R. P. & Somssich, I. E. Negative regulation  
670 of ABA signaling by WRKY33 is critical for Arabidopsis immunity towards *Botrytis*  
671 *cinerea* 2100. *Elife* **4**, e07295 (2015).

672 9. Morohashi, K. & Grotewold, E. A systems approach reveals regulatory circuitry for  
673 Arabidopsis trichome initiation by the GL3 and GL1 selectors. *PLoS Genet.* **5**,  
674 e1000396 (2009).

675 10. Morohashi, K. *et al.* A genome-wide regulatory framework identifies maize pericarp

- 676 color1 controlled genes. *Plant Cell* **24**, 2745–2764 (2012).
- 677 11. Eveland, A. L. *et al.* Regulatory modules controlling maize inflorescence architecture.  
678 *Genome Res* **24**, 431–443 (2014).
- 679 12. Gitter, A. *et al.* Backup in gene regulatory networks explains differences between  
680 binding and knockout results. *Mol. Syst. Biol.* **5**, 1–7 (2009).
- 681 13. Hu, Z., Killion, P. J. & Iyer, V. R. Genetic reconstruction of a functional transcriptional  
682 regulatory network. *Nat. Genet.* **39**, 683–687 (2007).
- 683 14. Jiang, S. & Mortazavi, A. Integrating ChIP-seq with other functional genomics data.  
684 *Brief. Funct. Genomics* **17**, 104–115 (2018).
- 685 15. Banks, C. J., Joshi, A. & Michoel, T. Functional transcription factor target discovery  
686 via compendia of binding and expression profiles. *Sci. Rep.* **6**, 20649 (2016).
- 687 16. Eisen, M. B., Spellman, P. T., Brown, P. O. & Botstein, D. Cluster analysis and display  
688 of genome-wide expression patterns. *Proc. Natl. Acad. Sci. USA* **95**, 14863–14868  
689 (1998).
- 690 17. Haynes, B. C. *et al.* Mapping functional transcription factor networks from gene  
691 expression data. *Genome Res.* **23**, 1319–1328 (2013).
- 692 18. Stuart, J. M., Segal, E., Koller, D. & Kim, S. K. A gene-coexpression network for  
693 global discovery of conserved genetic modules. *Science (80-. ).* **302**, 249–255 (2003).
- 694 19. Song, L., Langfelder, P. & Horvath, S. Comparison of co-expression measures: mutual  
695 information, correlation, and model based indices. *BMC Bioinformatics* **13**, 328 (2012).
- 696 20. Wu, G. & Ji, H. ChIPXpress: Using publicly available gene expression data to improve  
697 ChIP-seq and ChIP-chip target gene ranking. *BMC Bioinformatics* **14**, (2013).
- 698 21. Rao, X. & Dixon, R. A. Co-expression networks for plant biology: Why and how. *Acta*  
699 *Biochim. Biophys. Sin. (Shanghai)*. **51**, 981–988 (2019).
- 700 22. Vandepoele, K., Quimbaya, M., Casneuf, T., De Veylder, L. & Van de Peer, Y.  
701 Unraveling transcriptional control in Arabidopsis using cis-regulatory elements and  
702 coexpression networks. *Plant Physiol.* **150**, 535–546 (2009).
- 703 23. Allocco, D. J., Kohane, I. S. & Butte, A. J. Quantifying the relationship between co-  
704 expression, co-regulation and gene function. *BMC Bioinformatics* **5**, 18 (2004).
- 705 24. Reményi, A., Schöler, H. R. & Wilmanns, M. Combinatorial control of gene  
706 expression. *Nat. Struct. Mol. Biol.* **11**, 812 (2004).
- 707 25. Brkljacic, J. & Grotewold, E. Combinatorial control of plant gene expression. *Biochim*  
708 *Biophys Acta* **1860**, 31–40 (2017).
- 709 26. Morgan, X. C., Ni, S., Miranker, D. P. & Iyer, V. R. Predicting combinatorial binding

- 710 of transcription factors to regulatory elements in the human genome by association rule  
711 mining. *BMC Bioinformatics* **8**, 1–14 (2007).
- 712 27. Guo, Y. & Gifford, D. K. Modular combinatorial binding among human trans-acting  
713 factors reveals direct and indirect factor binding. *BMC Genomics* **18**, 1–16 (2017).
- 714 28. Kulkarni, S. R., Vaneechoutte, D., Van de Velde, J. & Vandepoele, K. TF2Network:  
715 predicting transcription factor regulators and gene regulatory networks in Arabidopsis  
716 using publicly available binding site information. *Nucleic Acids Res.* **46**, e31–e31  
717 (2018).
- 718 29. Haque, S., Ahmad, J. S., Clark, N. M., Williams, C. M. & Sozzani, R. Computational  
719 prediction of gene regulatory networks in plant growth and development. *Curr Opin*  
720 *Plant Biol* **47**, 96–105 (2019).
- 721 30. Ravasi, T. *et al.* An atlas of combinatorial transcriptional regulation in mouse and man.  
722 *Cell* **140**, 744–752 (2010).
- 723 31. Wray, G. A. *et al.* The evolution of transcriptional regulation in eukaryotes. *Mol Biol*  
724 *Evol* **20**, 1377–1419 (2003).
- 725 32. Obayashi, T., Aoki, Y., Tadaka, S., Kagaya, Y. & Kinoshita, K. ATTED-II in 2018: A  
726 Plant Coexpression Database Based on Investigation of the Statistical Property of the  
727 Mutual Rank Index. *Plant Cell Physiol.* **59**, e3–e3 (2018).
- 728 33. Palaniswamy, K. *et al.* AGRIS and AtRegNet: A platform to link cis-regulatory  
729 elements and transcription factors into regulatory networks. *Plant Physiol.* **140**, 818–  
730 829 (2006).
- 731 34. Yilmaz, A. *et al.* AGRIS: the Arabidopsis Gene Regulatory Information Server, an  
732 update. *Nucleic Acids Res.* **39**, D1118–22 (2011).
- 733 35. Oughtred, R. *et al.* The BioGRID interaction database: 2019 update. *Nucleic Acids Res.*  
734 **47**, D529–D541 (2019).
- 735 36. Banf, M. & Rhee, S. Y. Computational inference of gene regulatory networks:  
736 Approaches, limitations and opportunities. *Biochim. Biophys. Acta (BBA)-Gene Regul.*  
737 *Mech.* **1860**, 41–52 (2017).
- 738 37. Obayashi, T. & Kinoshita, K. Rank of correlation coefficient as a comparable measure  
739 for biological significance of gene coexpression. *DNA Res.* **16**, 249–260 (2009).
- 740 38. Uygun, S., Peng, C., Lehti-Shiu, M. D., Last, R. L. & Shiu, S. H. Utility and  
741 Limitations of Using Gene Expression Data to Identify Functional Associations. *PLoS*  
742 *Comput. Biol.* **12**, 1–27 (2016).
- 743 39. de la Fuente, A., Bing, N., Hoeschele, I. & Mendes, P. Discovery of meaningful

- 744 associations in genomic data using partial correlation coefficients. *Bioinformatics* **20**,  
745 3565–3574 (2004).
- 746 40. Kim, S. ppcor: An R Package for a Fast Calculation to Semi-partial Correlation  
747 Coefficients. *Commun. Stat. Appl. Methods* **22**, 665–674 (2015).
- 748 41. Nagarajan, V. K., Satheesh, V., Poling, M. D., Raghothama, K. G. & Jain, A.  
749 Arabidopsis MYB-Related HHO2 Exerts a Regulatory Influence on a Subset of Root  
750 Traits and Genes Governing Phosphate Homeostasis. *Plant Cell Physiol* **57**, 1142–1152  
751 (2016).
- 752 42. Varala, K. *et al.* Temporal transcriptional logic of dynamic regulatory networks  
753 underlying nitrogen signaling and use in plants. *Proc Natl Acad Sci U S A* **115**, 6494–  
754 6499 (2018).
- 755 43. Chen, D., Yan, W., Fu, L. Y. & Kaufmann, K. Architecture of gene regulatory  
756 networks controlling flower development in Arabidopsis thaliana. *Nat Commun* **9**,  
757 4534 (2018).
- 758 44. Bechtold, U. *et al.* Time-series transcriptomics reveals that AGAMOUS-LIKE22  
759 affects primary metabolism and developmental processes in drought-stressed  
760 arabidopsis. *Plant Cell* **28**, 345–366 (2015).
- 761 45. Song, L. *et al.* A transcription factor hierarchy defines an environmental stress response  
762 network. *Science (80-. )*. **354**, aag1550 (2016).
- 763 46. Wilkins, O., Bräutigam, K. & Campbell, M. M. Time of day shapes Arabidopsis  
764 drought transcriptomes. *Plant J.* **63**, 715–727 (2010).
- 765 47. Harb, A., Krishnan, A., Ambavaram, M. M. R. & Pereira, A. Molecular and  
766 physiological analysis of drought stress in arabidopsis reveals early responses leading  
767 to acclimation in plant growth. *Plant Physiol.* **154**, 1254–1271 (2010).
- 768 48. Bemer, M., van Dijk, A. D. J., Immink, R. G. H. & Angenent, G. C. Cross-family  
769 transcription factor interactions: an additional layer of gene regulation. *Trends Plant*  
770 *Sci.* **22**, 66–80 (2017).
- 771 49. Lambert, S. A. *et al.* The human transcription factors. *Cell* **172**, 650–665 (2018).
- 772 50. Trigg, S. A. *et al.* CrY2H-seq: A massively multiplexed assay for deep-coverage  
773 interactome mapping. *Nat. Methods* **14**, 819–825 (2017).
- 774 51. Bi, C. *et al.* Arabidopsis ABI5 plays a role in regulating ROS homeostasis by  
775 activating CATALASE 1 transcription in seed germination. *Plant Mol Biol* **94**, 197–  
776 213 (2017).
- 777 52. Lynch, T., Erickson, B. J. & Finkelstein, R. R. Direct interactions of ABA-



- 778 insensitive(ABI)-clade protein phosphatase(PP)2Cs with calcium-dependent protein  
779 kinases and ABA response element-binding bZIPs may contribute to turning off ABA  
780 response. *Plant Mol. Biol.* **80**, 647–658 (2012).
- 781 53. Yoshida, T. *et al.* AREB1, AREB2, and ABF3 are master transcription factors that  
782 cooperatively regulate ABRE-dependent ABA signaling involved in drought stress  
783 tolerance and require ABA for full activation. *Plant J.* **61**, 672–685 (2010).
- 784 54. Skubacz, A., Daszkowska-Golec, A. & Szarejko, I. The role and regulation of ABI5  
785 (ABA-insensitive 5) in plant development, abiotic stress responses and phytohormone  
786 crosstalk. *Front. Plant Sci.* **7**, 1–17 (2016).
- 787 55. Milo, R. *et al.* Superfamilies of Evolved and Designed Networks. *Science (80-. )*. **303**,  
788 1538–1542 (2004).
- 789 56. Colinas, M. & Goossens, A. Combinatorial Transcriptional Control of Plant  
790 Specialized Metabolism. *Trends Plant Sci* **23**, 324–336 (2018).
- 791 57. Droge-Laser, W. & Weiste, C. The C/S1 bZIP Network: A Regulatory Hub  
792 Orchestrating Plant Energy Homeostasis. *Trends Plant Sci* **23**, 422–433 (2018).
- 793 58. Finkelstein, R., Gampala, S. S. L., Lynch, T. J., Thomas, T. L. & Rock, C. D.  
794 Redundant and distinct functions of the ABA response loci ABA-insensitive(ABI)5  
795 and ABRE-binding factor (ABF)3. *Plant Mol. Biol.* **59**, 253–267 (2005).
- 796 59. Gao, S. *et al.* ABF2, ABF3, and ABF4 Promote ABA-Mediated Chlorophyll  
797 Degradation and Leaf Senescence by Transcriptional Activation of Chlorophyll  
798 Catabolic Genes and Senescence-Associated Genes in Arabidopsis. *Mol Plant* **9**, 1272–  
799 1285 (2016).
- 800 60. Hwang, K., Susila, H., Nasim, Z., Jung, J. Y. & Ahn, J. H. Arabidopsis ABF3 and  
801 ABF4 Transcription Factors Act with the NF-YC Complex to Regulate SOC1  
802 Expression and Mediate Drought-Accelerated Flowering. *Mol. Plant* **12**, 489–505  
803 (2019).
- 804 61. Kulkarni, S. R. & Vandepoele, K. Inference of plant gene regulatory networks using  
805 data-driven methods: A practical overview. *Biochim Biophys Acta Gene Regul Mech*  
806 194447 (2019). doi:10.1016/j.bbagr.2019.194447
- 807 62. Emad, A. & Bailey, P. wCorr: Weighted Correlations. *R-project.org* [https://CRAN.R-](https://CRAN.R-project.org/package=wCorr)  
808 [project.org/package=wCorr](https://CRAN.R-project.org/package=wCorr) (2017).
- 809 63. Sales, G. & Romualdi, C. Parmigene-a parallel R package for mutual information  
810 estimation and gene network reconstruction. *Bioinformatics* **27**, 1876–1877 (2011).
- 811 64. Yoav Benjamini & Yosef Hochberg. Controlling the False Discovery Rate: A Practical

812 and Powerful Approach to Multiple Testing. *J. R. Stat. Soc. Ser. B* 57, 289–300 (1995).

813

814 **FIGURES**

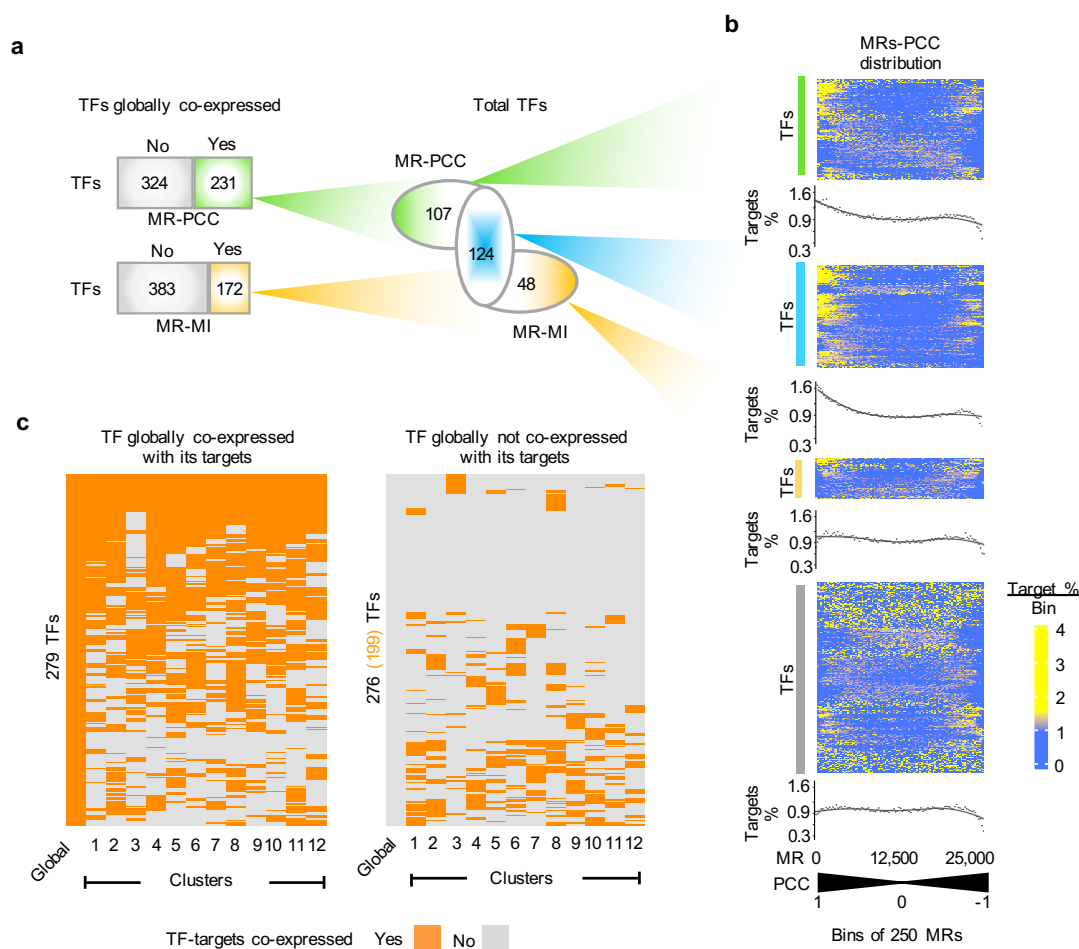

815

816

817 **Figure 1.** Patterns of co-expression between TFs and their direct target genes. **(a)** Total number of TFs co-  
 818 expressed with their corresponding targets across all tissues and conditions (global) based on MR-PCC and MR-  
 819 MI. The Venn diagrams represent the overlap between both type of metrics. **(b)** Heat maps displaying the  
 820 distribution of MR-PCC values across 25,296 *Arabidopsis* genes. TFs were separated into four co-expression  
 821 groups: TFs co-expressed with its targets based on MR-PCC (107 TFs), on MR-PCC and MR-MI (124 TFs), MR-  
 822 MI (48 TFs), and TFs that did not shown significant co-expression with its corresponding targets (555 - 107 - 276  
 823 - 44 = 276 TFs). Colors represent the percentage of TF targets within bins of 250 MRs. In total, there are 101 bins  
 824 along the PCC distribution corresponding to co-expression values of each TF with 25,296 genes (genes expressed  
 825 in dataset used, see *Methods*). Small MR values represent positive PCC values, while large MR values correspond  
 826 to negative PCC values. Dot plots (seen as curves) under each heat map represent the average percentage of targets  
 827 for all the TFs for each bin. **(c)** Heatmap indicating the local co-expression profile of each TFs analyzed along 12  
 828 different expression clusters. The color represents binary state of co-expression with yes (co-expressed) in orange  
 829 and no (no co-expression) in grey. The left panel represents TFs which are co-expressed globally with their targets,  
 830 while the right panel represents those that are not.

831

832

833

834

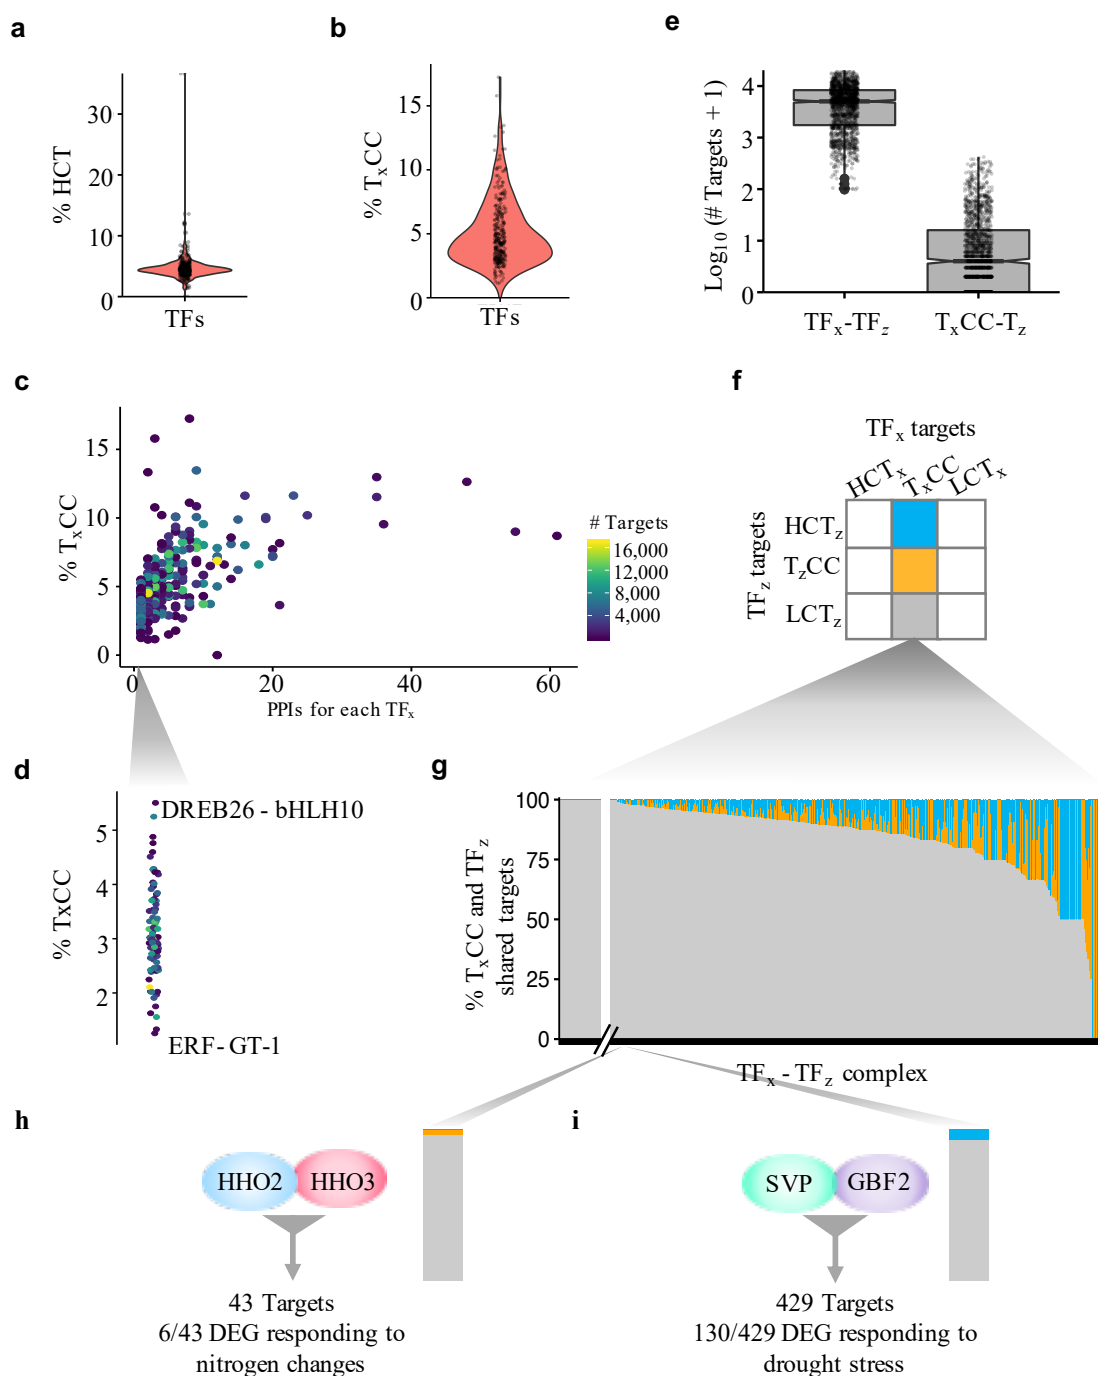

835

836

837 **Figure 2.** Targets are more frequently co-expressed with TF complexes, but not with individual TFs. **(a)** Violin  
 838 plot showing the percentage of highly co-expressed targets (HCT) for 313 TFs. **(b)** Violin plot representing the  
 839 percentage of low co-expressed targets (LCTs) that correspond to targets co-expressed with a TF<sub>x</sub> complex (T<sub>x</sub>CC).  
 840 **(c)** Percentage of T<sub>x</sub>CCs as a function of the total number of PPIs in which each TF is involved. **(d)** Magnification  
 841 of the section in (c) corresponding to TFs with just one interacting partner. DREB26-bHLH10 and ERF  
 842 (At4g18450)-GT-1 represent the extreme upper and lower cases on the distribution. The color scale in (c) and (d)  
 843 represent the number of targets for each TF. **(e)** Boxplot showing the number of shared targets between the 815  
 844 TF complexes analyzed and the number of targets of a given TF<sub>x</sub> co-expressed with the complex TF<sub>x</sub>-TF<sub>z</sub> (T<sub>x</sub>CC)  
 845 that are also targets of TF<sub>z</sub>. **(f)** Venn diagrams displaying how targets of a TF<sub>z</sub> are distributed among the HCTs,  
 846 TCCs, or LCTs of a TF<sub>x</sub> represented in blue, orange and yellow, respectively. **(g)** Distribution of targets  
 847 according to the comparison in (f) for the of 815 TF<sub>x</sub>-TF<sub>y</sub> complexes analyzed. Complexes are along the x-axis, while the y-  
 848 axis indicates the overlapping frequency. The HHO2-HHO3 **(h)** and SVP-GBF2 **(i)** TF complexes provide

849 representative examples from the 815 TF complexes analyzed. **(h)** The numbers indicate the differential expressed  
 850 genes (DEG) under different nitrogen growth conditions. **(i)** The numbers indicate DEGs, also predicted as targets  
 851 of the corresponding complexes, under drought stress in three different studies. Side bar plot represents a zoom  
 852 over the HHO2-HHO3 and SVP-GBF2 position on the shared target distribution displayed in **(g)**.  
 853

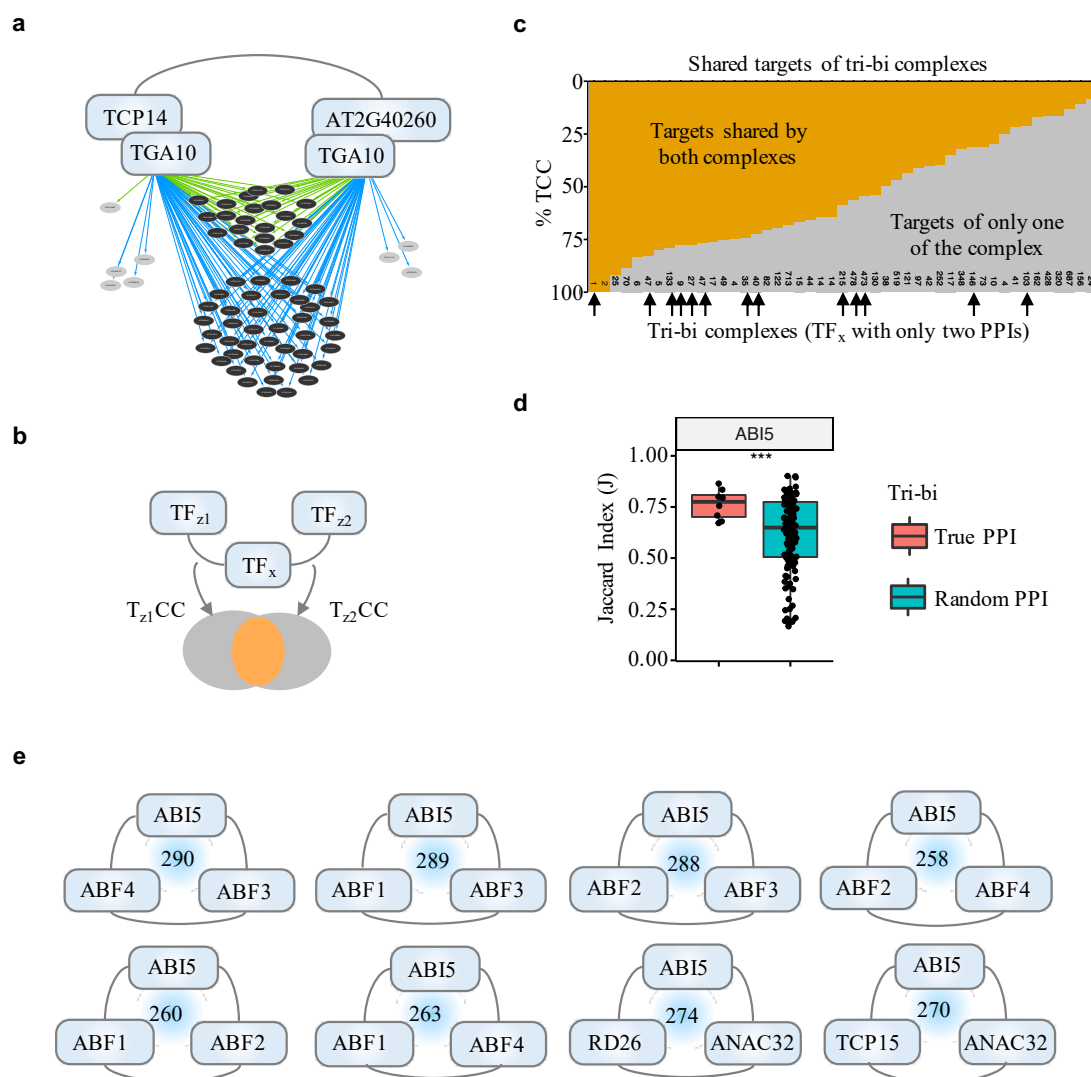

854  
 855

856 **Figure 3.** Common co-expressed targets of TF complexes suggest higher-order TF arrangements. **(a)** Shared co-  
 857 expressed targets for the TGA10-TCP14 and TGA10-AT2G40260 TF complexes. Common targets for both  
 858 complexes in each instance are indicated in black, while those controlled by one complex, but not by the other are  
 859 in light gray. Green arrows show targets with a positive co-expression correlation (indicative of activation), while  
 860 those in blue correspond to targets with a negative co-expression correlation (indicative of repression) with the  
 861 respective TF complexes. **(b)** Schematic representation of the strategy used to identify shared targets by comparing  
 862  $T_xCC$  between pairs of dimers. **(c)** Percentage of the total targets that are bound by both complexes (orange) or  
 863 just by one (gray). Black arrows indicate tri-bi complexes with PPI information for all three binary interactions.  
 864 **(d)** ABI5 as one example of 12 TFs for which the fraction of shared targets of the tri-bi complexes are significantly  
 865 larger (two-sided  $t$ -test  $P < 0.05$ ) than tri-bi complexes formed by random interactions. Similarity between the sets  
 866 of target genes of corresponding dimers were measured by computing the respective Jaccard indices. **(e)** Tri-bi  
 867 complexes involving ABI5. Experimentally-verified interactions are indicated by lines, and targets of the  
 868 complexes are indicated by the numbers in blue.  
 869

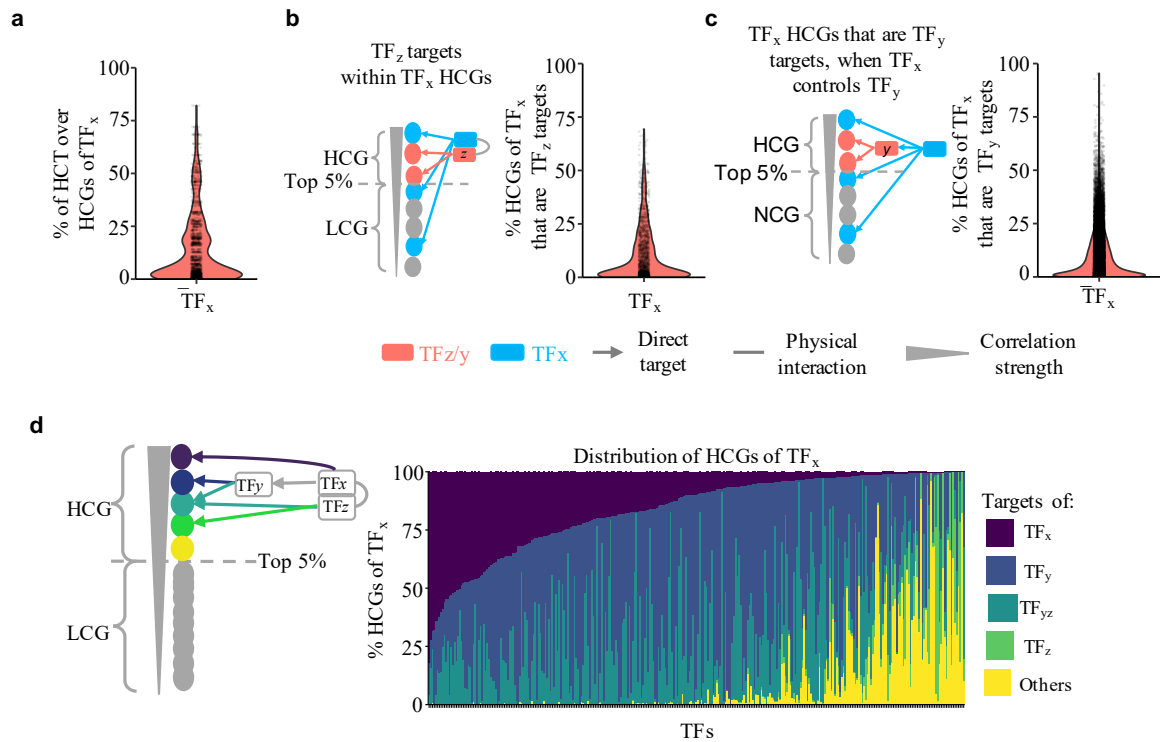

870  
 871  
 872  
 873  
 874  
 875  
 876

**Figure 4.** Genes highly co-expressed with TFs are enriched in indirect TF targets. **(a)** Percentage of highly co-expressed genes (HCGs) of  $TF_x$  that are actual targets of  $TF_x$ . **(b)** Model and percentage of highly co-expressed genes that are potential indirect targets of  $TF_x$  because of indirect action of a  $TF_z$  interactor of  $TF_x$ . **(c)** Model and percentage of highly co-expressed genes that are targets of a  $TF_y$  regulated by  $TF_x$ . **(d)** Percentage of HCGs explained as direct or indirect targets of  $TF_x$ .
